# Supplementary material for: Oxidative Biochemistry Disbalance and Changes on Proteomic Profile in Salivary Glands of Rats Induced by Chronic Exposure to Methylmercury
Source: PubMed Central journal article supplement (PMC5546058; doi:10.1155/2017/5653291), 2017-07-24
Supplement: 5653291.f2.pdf [file 5653291.f2.pdf]

Supplementary Table 1. Proteins exclusively present in rat parotid glands in MeHg (Hg) group.

| <b><sup>a</sup>Access number</b> | <b>Protein name description</b>                                               | <b>PLGS Score</b> |
|----------------------------------|-------------------------------------------------------------------------------|-------------------|
| P68511                           | 14-3-3 protein eta                                                            | 175,01            |
| P61983                           | 14-3-3 protein gamma                                                          | 117,35            |
| P63102                           | 14-3-3 protein zeta/delta                                                     | 146,33            |
| Q08163                           | Adenylyl cyclase-associated protein 1                                         | 176,65            |
| D3ZCV5                           | Aldehyde dehydrogenase, cytosolic 1                                           | 130,57            |
| P62161                           | Calmodulin                                                                    | 401,4             |
| G3V9M0                           | Cystatin                                                                      | 650,62            |
| P06214                           | Delta-aminolevulinic acid dehydratase                                         | 130,7             |
| Q641Y0                           | Dolichyl-diphosphooligosaccharide--protein glycosyltransferase 48 kDa subunit | 271,08            |
| MORCH0                           | Eukaryotic translation initiation factor 3 subunit I                          | 237,45            |
| B0BNA7                           | Eukaryotic translation initiation factor 3 subunit I                          | 237,45            |
| P82995                           | Heat shock protein HSP 90-alpha                                               | 113,76            |
| P34058                           | Heat shock protein HSP 90-beta                                                | 216,52            |
| P56574                           | Isocitrate dehydrogenase [NADP], mitochondrial                                | 131,56            |
| P67779                           | Prohibitin                                                                    | 153,08            |
| O88767                           | Protein deglycase DJ-1                                                        | 414,81            |
| Q5EBB0                           | Protein LOC298795                                                             | 117,35            |
| Q8K3F3                           | Protein phosphatase 1 regulatory subunit 14B                                  | 247,45            |
| G3V834                           | Protein PRRC1                                                                 | 138,28            |
| G3V9A3                           | Protein Sfn                                                                   | 117,35            |
| P51647                           | Retinal dehydrogenase 1                                                       | 133,52            |
| Q66X93                           | Staphylococcal nuclease domain-containing protein 1                           | 112,93            |
| Q3MIE4                           | Synaptic vesicle membrane protein VAT-1 homolog                               | 264,18            |
| Q9JKC9                           | Synerglin gamma                                                               | 116,86            |
| Q64428                           | Trifunctional enzyme subunit alpha, mitochondrial                             | 145,78            |

The identified proteins unique in Hg group are organized according to the alphabetical order. <sup>a</sup>Identification is based on protein ID from UniProt protein database (<http://www.uniprot.org/>).

Supplementary Table 2. Proteins exclusively present in rat parotid glands control group

| <b><sup>a</sup>Access number</b> | <b>Protein name description</b>                                    | <b>PLGS Score</b> |
|----------------------------------|--------------------------------------------------------------------|-------------------|
| P29266                           | 3-hydroxyisobutyrate dehydrogenase, mitochondrial                  | 174,83            |
| P13471                           | 40S ribosomal protein S14                                          | 114,97            |
| P38983                           | 40S ribosomal protein SA                                           | 250,76            |
| G3V880                           | Aa1017                                                             | 121,63            |
| G3V6S2                           | Aconitate hydratase                                                | 95,99             |
| P00330                           | Alcohol dehydrogenase 1                                            | 3123,4            |
| Q8VHE9                           | All-trans-retinol 13,14-reductase                                  | 156,89            |
| P49088                           | Asparagine synthetase [glutamine-hydrolyzing]                      | 87,56             |
| Q499T7                           | Cilia- and flagella-associated protein 20                          | 202,78            |
| P02454                           | Collagen alpha-1(I) chain                                          | 93,85             |
| Q62737                           | Cytochrome b-245 light chain                                       | 71,92             |
| Q68FY0                           | Cytochrome b-c1 complex subunit 1, mitochondrial                   | 105,14            |
| Q63270                           | Cytoplasmic aconitate hydratase                                    | 91,63             |
| Q68FU3                           | Electron transfer flavoprotein subunit beta                        | 131,56            |
| Q68FR9                           | Elongation factor 1-delta                                          | 132,39            |
| Q99PF5                           | Far upstream element-binding protein 2                             | 71,94             |
| P04906                           | Glutathione S-transferase P                                        | 558,96            |
| P62828                           | GTP-binding nuclear protein Ran                                    | 216,61            |
| Q3KRF2                           | High density lipoprotein binding protein (Vigilin)                 | 110,19            |
| B4F777                           | High mobility group nucleosome-binding domain-containing protein 5 | 141,91            |
| M0RCB8                           | Histone H3                                                         | 155,2             |
| Q6IFW6                           | Keratin, type I cytoskeletal 10                                    | 119,33            |
| Q6IFV1                           | Keratin, type I cytoskeletal 14                                    | 125,11            |
| Q6IFV3                           | Keratin, type I cytoskeletal 15                                    | 105,3             |
| Q6IFU8                           | Keratin, type I cytoskeletal 17                                    | 122,8             |
| Q6IFX1                           | Keratin, type I cytoskeletal 24                                    | 102,47            |
| Q6IFU7                           | Keratin, type I cytoskeletal 42                                    | 105,3             |
| Q6IG12                           | Keratin, type II cytoskeletal 7                                    | 116,62            |
| O88989                           | Malate dehydrogenase, cytoplasmic                                  | 178,2             |
| B1WC26                           | N-acetylneuraminic acid synthase                                   | 265,94            |
| G3V8R1                           | Nucleobindin 2, isoform CRA_b                                      | 131,59            |
| Q9JI85                           | Nucleobindin-2                                                     | 131,59            |
| Q5U317                           | Pre-mRNA 3'-end-processing factor FIP1                             | 100,68            |

|        |                                              |        |
|--------|----------------------------------------------|--------|
| D4ADC7 | Protein Adgra2                               | 75,19  |
| G3V6Y7 | Protein Caap1                                | 204,58 |
| F1M5A1 | Protein Calr4                                | 127,07 |
| Q63081 | Protein disulfide-isomerase A6               | 142,66 |
| D3ZN42 | Protein Fam122b                              | 169,96 |
| F1MAF7 | Protein Krt33a                               | 159,6  |
| Q6IFV6 | Protein Krt35                                | 123,6  |
| Q6IFV5 | Protein Krt36                                | 102,47 |
| M0RCJ8 | Protein Krt78                                | 79,76  |
| F1MAC2 | Protein Krt78                                | 79,76  |
| Q6PDV6 | Protein LOC100911847                         | 114,97 |
| M0R6R9 | Protein LOC102549011                         | 281,46 |
| D3ZL21 | Protein LOC685619                            | 93,55  |
| Q6MG75 | Protein Nelfe                                | 112,12 |
| F1LP37 | Protein Nxn1                                 | 75,75  |
| B5DF04 | Protein Rad51                                | 116,75 |
| F1LU69 | Protein Rps27a-ps12                          | 109,79 |
| M0RCU2 | Protein Rrbp1                                | 72,86  |
| M0RBS6 | Protein Rrbp1                                | 72,86  |
| B2RZD1 | Protein Sec61b                               | 180,22 |
| D3ZD11 | Protein Spcs2                                | 274,89 |
| D3Z854 | Protein Tti1                                 | 81,17  |
| Q4QQV0 | Protein Tubb6                                | 121,37 |
| D4A2P7 | Similar to Brain protein 44-like (Predicted) | 128,16 |
| P07632 | Superoxide dismutase [Cu-Zn]                 | 421,28 |
| P46462 | Transitional endoplasmic reticulum ATPase    | 101,1  |
| Q5XIF6 | Tubulin alpha-4A chain                       | 105,57 |
| P62982 | Ubiquitin-40S ribosomal protein S27a         | 109,79 |
| P62986 | Ubiquitin-60S ribosomal protein L40          | 109,79 |
| Q9Z1A6 | Vigilin                                      | 115,02 |

The identified proteins unique in Control group are organized according to the alphabetical order. <sup>a</sup>Identification is based on protein ID from UniProt protein database (<http://www.uniprot.org/>).

Supplementary Table 3. Proteins exclusively present in rats submandibular glands in Hg (MeHg) group.

| <sup>a</sup> Access number | Protein name description         | PLGS Score |
|----------------------------|----------------------------------|------------|
| P06761                     | 78 kDa glucose-regulated protein | 416,41     |
| Q09073                     | ADP/ATP translocase 2            | 315,62     |

|        |                                                       |        |
|--------|-------------------------------------------------------|--------|
| M0R8M9 | Heat shock cognate 71 kDa protein                     | 316,02 |
| P14659 | Heat shock-related 70 kDa protein 2                   | 60,85  |
| Q63279 | Keratin, type I cytoskeletal 19                       | 164,41 |
| Q64335 | Killer cell lectin-like receptor subfamily G member 1 | 189,51 |
| F1LTD7 | Protein Dennd4c                                       | 421,22 |
| F1LM05 | Protein LOC299282                                     | 121,86 |
| D3ZFB2 | Protein Luc7l3                                        | 420,9  |
| Q6MG75 | Protein Nelfe                                         | 253,66 |
| F1M5J3 | Protein Nipa1                                         | 222,49 |
| Q9EPJ1 | Protein Twist1                                        | 168,85 |
| P05544 | Serine protease inhibitor A3L                         | 121,86 |
| P68370 | Tubulin alpha-1A chain                                | 191,53 |
| Q6P9V9 | Tubulin alpha-1B chain                                | 170,38 |
| Q6AYZ1 | Tubulin alpha-1C chain                                | 191,53 |

The identified proteins unique in Hg group are organized according to the alphabetical order. <sup>a</sup>Identification is based on protein ID from UniProt protein database (<http://www.uniprot.org/>).

Supplementary Table 4. Proteins exclusively present in rats submandibular glands in control group.

| <b>Access number</b> | <b>Protein name description</b>           | <b>PLGS Score</b> |
|----------------------|-------------------------------------------|-------------------|
| P35213               | 14-3-3 protein beta/alpha                 | 285,92            |
| P62260               | 14-3-3 protein epsilon                    | 268,52            |
| P68511               | 14-3-3 protein eta                        | 268,52            |
| P61983               | 14-3-3 protein gamma                      | 268,52            |
| P68255               | 14-3-3 protein theta                      | 268,52            |
| P35434               | ATP synthase subunit delta, mitochondrial | 210,14            |
| P62161               | Calmodulin                                | 588,62            |
| M0R8J8               | Carboxylic ester hydrolase                | 147,62            |
| G3V936               | Citrate synthase                          | 265,57            |
| Q8VHF5               | Citrate synthase, mitochondrial           | 265,57            |
| P09605               | Creatine kinase S-type, mitochondrial     | 221,42            |
| Q6MGB6               | E3 ubiquitin-protein ligase RING1         | 158,98            |
| P07323               | Gamma-enolase                             | 131,56            |
| M0R660               | Glyceraldehyde-3-phosphate dehydrogenase  | 171,14            |
| P0CG51               | Polyubiquitin-B                           | 203,24            |
| F1LML2               | Polyubiquitin-C                           | 203,24            |
| F1M446               | Protein AI314180                          | 349,26            |
| P11598               | Protein disulfide-isomerase A3            | 352,92            |
| F1LRA1               | Protein ERGIC-53                          | 214,36            |

|        |                                                      |        |
|--------|------------------------------------------------------|--------|
| Q5EBB0 | Protein LOC298795                                    | 268,52 |
| D3ZBG6 | Protein Ptrhd1                                       | 351,89 |
| F1LU69 | Protein Rps27a-ps12                                  | 203,24 |
| G3V9A3 | Protein Sfn                                          | 268,52 |
| P18897 | SMR2 protein                                         | 474,84 |
| Q9JK00 | Sodium channel subunit beta-3                        | 193,86 |
| P06686 | Sodium/potassium-transporting ATPase subunit alpha-2 | 148,81 |
| P51514 | Transcription factor 12                              | 447,77 |
| Q6MFY8 | Tripartite motif-containing protein 40               | 184,95 |
| Q4QRB4 | Tubulin beta-3 chain                                 | 192,64 |
| P62982 | Ubiquitin-40S ribosomal protein S27a                 | 203,24 |
| P62986 | Ubiquitin-60S ribosomal protein L40                  | 203,24 |

The identified proteins unique in Control group are organized according to the alphabetical order. <sup>a</sup>Identification is based on protein ID from UniProt protein database (<http://www.uniprot.org/>).

Supplementary Table 5. Proteins exclusively present in rats sublingual glands in Hg (MeHg) group.

| <sup>a</sup> Access number | Protein name description                         | PLGS Score |
|----------------------------|--------------------------------------------------|------------|
| P06761                     | 78 kDa glucose-regulated protein                 | 433,49     |
| P62161                     | Calmodulin                                       | 770,24     |
| Q68FY0                     | Cytochrome b-c1 complex subunit 1, mitochondrial | 122,57     |
| P63018                     | Heat shock cognate 71 kDa protein                | 674,38     |
| P14659                     | Heat shock-related 70 kDa protein 2              | 541,83     |
| Q00729                     | Histone H2B type 1-A                             | 239,59     |
| P01836                     | Ig kappa chain C region, A allele                | 434,5      |
| P13084                     | Nucleophosmin                                    | 321,07     |
| P10111                     | Peptidyl-prolyl cis-trans isomerase A            | 618,4      |
| Q63081                     | Protein disulfide-isomerase A6                   | 117,63     |
| Q3T114                     | Protein PRRC1                                    | 243,35     |
| D3Z810                     | Protein RGD1564129                               | 230,52     |
| MORCB1                     | Uncharacterized protein                          | 618,84     |

The identified proteins unique in Control group are organized according to the alphabetical order. <sup>a</sup>Identification is based on protein ID from UniProt protein database (<http://www.uniprot.org/>).

Supplementary Table 6. Proteins exclusively present in rats sublingual glands in control group.

| <b><sup>a</sup>Access number</b> | <b>Protein name description</b>                                                     | <b>PLGS Score</b> |
|----------------------------------|-------------------------------------------------------------------------------------|-------------------|
| MORCB1                           | Uncharacterized protein                                                             | 618,84            |
| Q4FZV3                           | Axonemal dynein light intermediate polypeptide 1                                    | 160,18            |
| P02466                           | Collagen alpha-2(I) chain                                                           | 250,32            |
| P00406                           | Cytochrome c oxidase subunit 2                                                      | 218,87            |
| P97541                           | Heat shock protein beta-6                                                           | 266,23            |
| P01835                           | Ig kappa chain C region, B allele                                                   | 644,39            |
| Q5BJY9                           | Keratin, type I cytoskeletal 18                                                     | 162,58            |
| D3ZAP1                           | Mediator of RNA polymerase II transcription, subunit 19 homolog (Yeast) (Predicted) | 291,11            |
| F1LQ08                           | Protein Car6                                                                        | 621,25            |
| D3ZE71                           | Protein Faap24                                                                      | 168               |
| F1LZM0                           | Protein Foxn2                                                                       | 139,63            |
| F1M3U4                           | Protein Gm15294                                                                     | 227,93            |
| M0R5K7                           | Protein Pradc1                                                                      | 190,66            |
| D4A3I2                           | Protein RGD1308117                                                                  | 145,8             |
| E9PSN4                           | Protein Zc3h13                                                                      | 135,79            |
| P12346                           | Serotransferrin                                                                     | 235,78            |
| P06685                           | Sodium/potassium-transporting ATPase subunit alpha-1                                | 171,71            |
| Q07984                           | Translocon-associated protein subunit delta                                         | 271,56            |
| Q6QMY6                           | Tsukushin                                                                           | 123,23            |
| P68370                           | Tubulin alpha-1A chain                                                              | 449,61            |
| Q6P9V9                           | Tubulin alpha-1B chain                                                              | 449,61            |
| Q6AYZ1                           | Tubulin alpha-1C chain                                                              | 449,61            |

The identified proteins unique in Control group are organized according to the alphabetical order. <sup>a</sup>Identification is based on protein ID from UniProt protein database (<http://www.uniprot.org/>).
